# Supplementary material for: Structural and electronic properties of alkali metal peroxides at high pressures
Source: Royal Society of Chemistry journal article supplement (doi:10.1039/c5ra22405e), 2015-01-01
Supplement: c5ra22405e1.pdf [file c5ra22405e1.pdf]

## Structural and Electronic Properties of Alkali Metal Peroxides at High Pressures

Naihang Deng<sup>a</sup>, Wenyong Wang<sup>a</sup>, Guochun Yang<sup>a,b,\*</sup>, and Yongqing Qiu<sup>a,\*</sup>

<sup>a</sup>Institute of Functional Material Chemistry, Faculty of Chemistry, Northeast Normal University, Changchun 130024, Jilin, P.R. China

<sup>b</sup>State Key Laboratory of Superhard Materials, Jilin University, Changchun 130012, China

|                                                                                                                                                                                                                            |     |
|----------------------------------------------------------------------------------------------------------------------------------------------------------------------------------------------------------------------------|-----|
| 1. The detail description of the structural prediction and computational method                                                                                                                                            | S2  |
| 2. The dependence of phase pressures and electronegativity for the considered alkali metal peroxides compounds                                                                                                             | S4  |
| 3. Calculated enthalpies per formula unit of various structures for Li <sub>2</sub> O <sub>2</sub> in the pressure range of 0–100 GPa with respect to <i>P6<sub>3</sub>/mmc</i> structure                                  | S4  |
| 4. Calculated enthalpies per formula unit of various structures for Na <sub>2</sub> O <sub>2</sub> in the pressure range of 0–100 GPa with respect to <i>P-62M</i> structure                                               | S5  |
| 5. Calculated enthalpies per formula unit of various structures for K <sub>2</sub> O <sub>2</sub> in the pressure range of 0–100 GPa with respect to <i>Cmca</i> structure                                                 | S6  |
| 6. Calculated enthalpies per formula unit of various structures for Rb <sub>2</sub> O <sub>2</sub> in the pressure range of 0–100 GPa with respect to <i>Immm</i> structure                                                | S6  |
| 7. Variation of the unit cell volume as a function of pressure for the ambient pressure structures and first-ordered phase transition structures                                                                           | S7  |
| 8. Phonon dispersion curve (blue) and partial phonon density of states (PDOS) for K <sub>2</sub> O <sub>2</sub> in the <i>pbam</i> structure and Rb <sub>2</sub> O <sub>2</sub> in the <i>C2/m</i> structure, respectively | S8  |
| 9. Pressure dependence of band gaps for the <i>P6<sub>3</sub>mmc</i> and <i>P2<sub>1</sub>/c</i> structures in Li <sub>2</sub> O <sub>2</sub>                                                                              | S9  |
| 10. The Bader or Mulliken charge for the <i>P6<sub>3</sub>mmc</i> and <i>P2<sub>1</sub>/c</i> structures of Li <sub>2</sub> O <sub>2</sub>                                                                                 | S10 |
| 11. Detailed structural information of the predicted first-order phase transition structures at selected pressures                                                                                                         | S11 |
| 12. Reference                                                                                                                                                                                                              | S12 |

## Computational details

Our structural prediction approach is based on a global minimization of free energy surfaces merging *ab initio* total-energy calculations through CALYPSO (Crystal structure AnaLYsis by Particle Swarm Optimization) methodology as implemented in its same-name CALYPSO code.<sup>1,2</sup> The high structures of studied compounds were searched with simulation cell sizes of 1–4 formula units (f.u.) at 0, 20, 40, 60, 80, and 100GPa, respectively. In the first step, random structures with certain symmetry are constructed in which the atomic coordinates are generated by the crystallographic symmetry operations. Local optimizations using VASP code,<sup>3</sup> were done with the conjugate gradients method and were stopped when the enthalpy changes became smaller than  $1 \times 10^{-5}$  eV per cell. After processing the first generation structures, 60% of them with lower enthalpies are selected to produce the next generation structures by PSO. 40% of the structures in the new generation are randomly generated. A structure fingerprinting technique of bond characterization matrix is applied to the generated structures, so that identical structures are strictly forbidden. These procedures significantly enhance the diversity of the structures, which is crucial for the efficiency of the global search of structures. For most of the cases, the structure searching simulation for each calculation was stopped after we generated 1000 ~ 1200 structures (e.g., about 20 ~ 30 generations).

To further analyze the structures with higher accuracy, we select a number of structures with lower enthalpies and perform structural optimization using density functional theory within the generalized gradient approximation<sup>4</sup> as implemented in

the VASP code. The cut-off energy for the expansion of wavefunctions into plane waves is set to 600 eV in all calculations, and the Monkhorst–Pack  $k$ -mesh with a maximum spacing of  $2\pi \times 0.015 \text{ \AA}^{-1}$  was individually adjusted in reciprocal space with respect to the size of each computational cell. This gives total energy well converged within  $\sim 1 \text{ meV/atom}$ . The force converge was set to  $0.01 \text{ eV/ \AA}$ . The electron-ion interaction was described by projected-augmented-wave potentials with  $2s^1p^0$ ,  $3s^1p^0$ ,  $4s^1p^0$ ,  $5s^1p^0$  and  $2s^22p^4$  and as valence electrons for Li, Na, K, Rb and O, respectively. To ensure that the obtained structures are dynamically stable, we calculated phonon frequencies throughout the Brillouin zone using the finite-dis-placement approach as implemented in the Phonopy code.<sup>5</sup> Computational details about the phonon were given in the following. The supercell sizes for  $\text{Li}_2\text{O}_2$ ,  $\text{Na}_2\text{O}_2$ ,  $\text{K}_2\text{O}_2$ , and  $\text{Rb}_2\text{O}_2$  are  $6 \times 6 \times 2$ ,  $5 \times 4 \times 2$ ,  $4 \times 4 \times 2$ , and  $2 \times 3 \times 3$ , respectively. The Monkhorst–Pack  $k$ -mesh with a maximum spacing of  $2\pi \times 0.04 \text{ \AA}^{-1}$  was individually adjusted in reciprocal space with respect to the size of each computational cell.

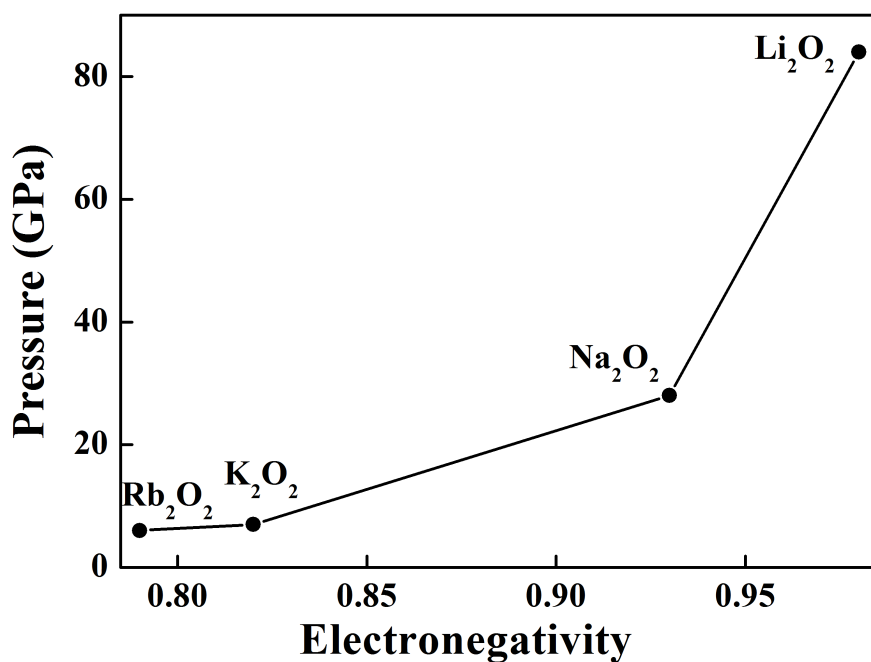

**Fig. S1** The dependence of phase pressures and electronegativity for the considered alkali metal peroxides compounds.

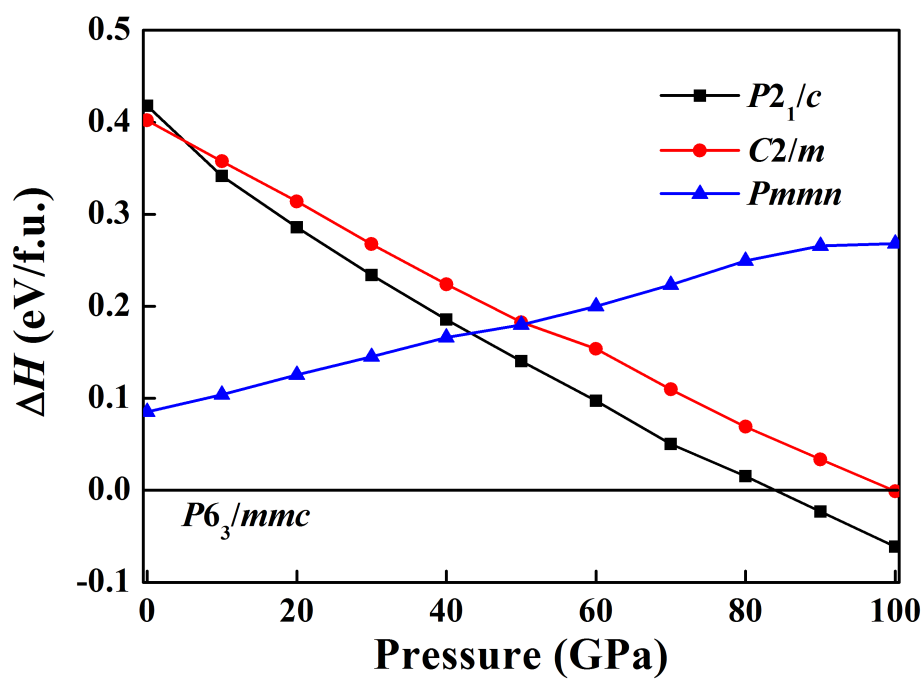

**Fig. S2** Calculated enthalpies per formula unit of various structures for  $\text{Li}_2\text{O}_2$  in the pressure range of 0–100 GPa with respect to  $P6_3/mmc$  structure.

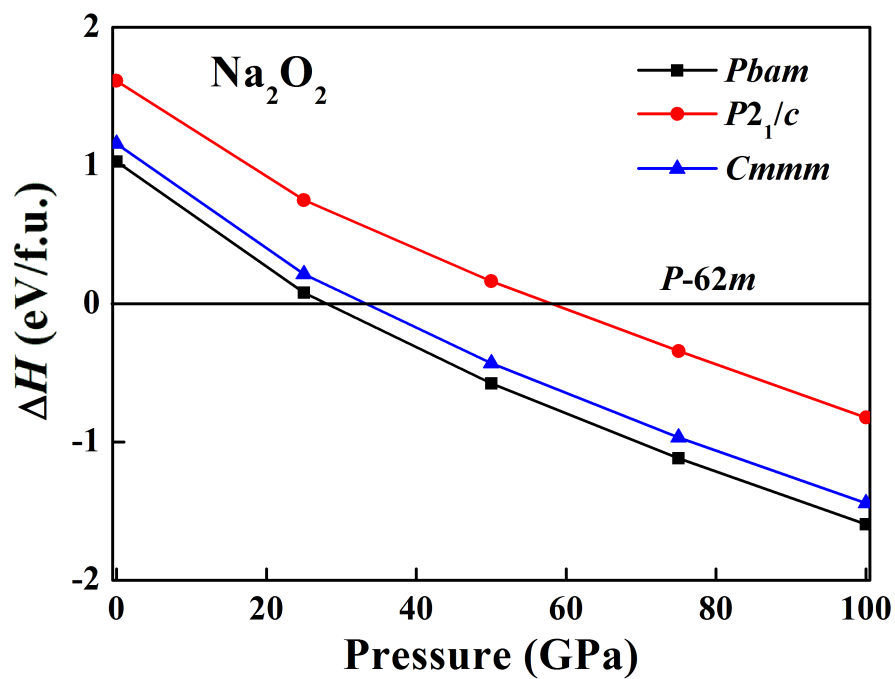

**Fig. S3** Calculated enthalpies per formula unit of various structures for  $\text{Na}_2\text{O}_2$  in the pressure range of 0–100 GPa with respect to  $P-62M$  structure.

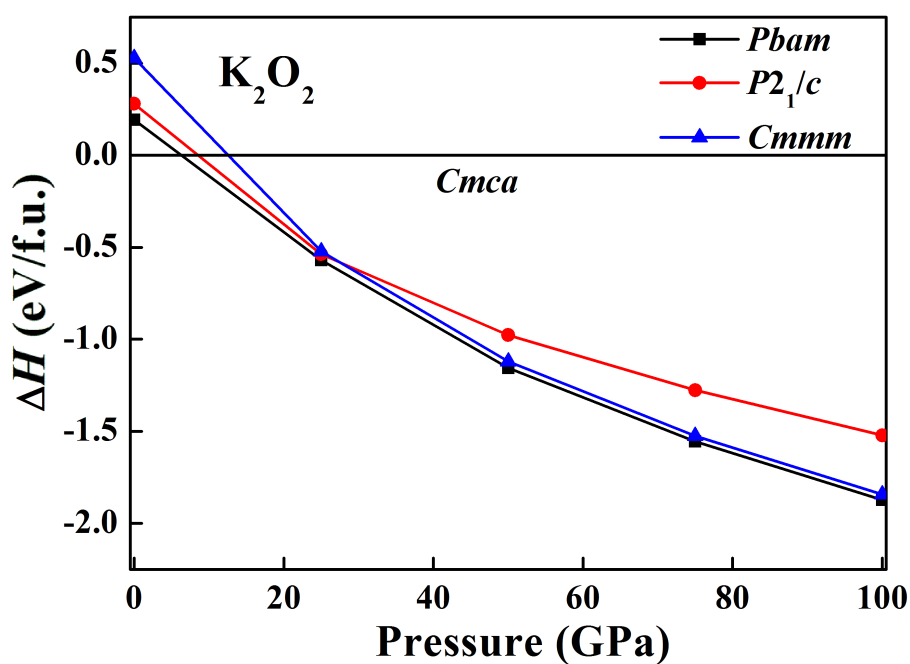

Fig. S4 Calculated enthalpies per formula unit of various structures for  $K_2O_2$  in the pressure range of 0–100 GPa with respect to  $Cmca$  structure.

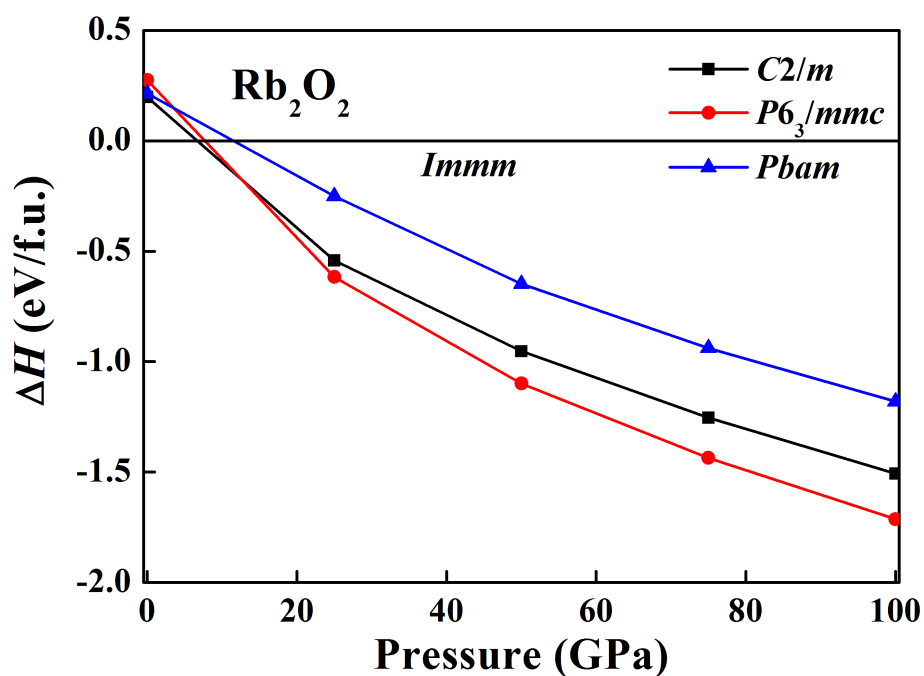

Fig. S5 Calculated enthalpies per formula unit of various structures for  $Rb_2O_2$  in the

pressure range of 0–100 GPa with respect to *Immm* structure. It is noted that  $\text{Rb}_2\text{O}_2$  are transformed to *P6<sub>3</sub>/mmc* structure at 18 GPa.

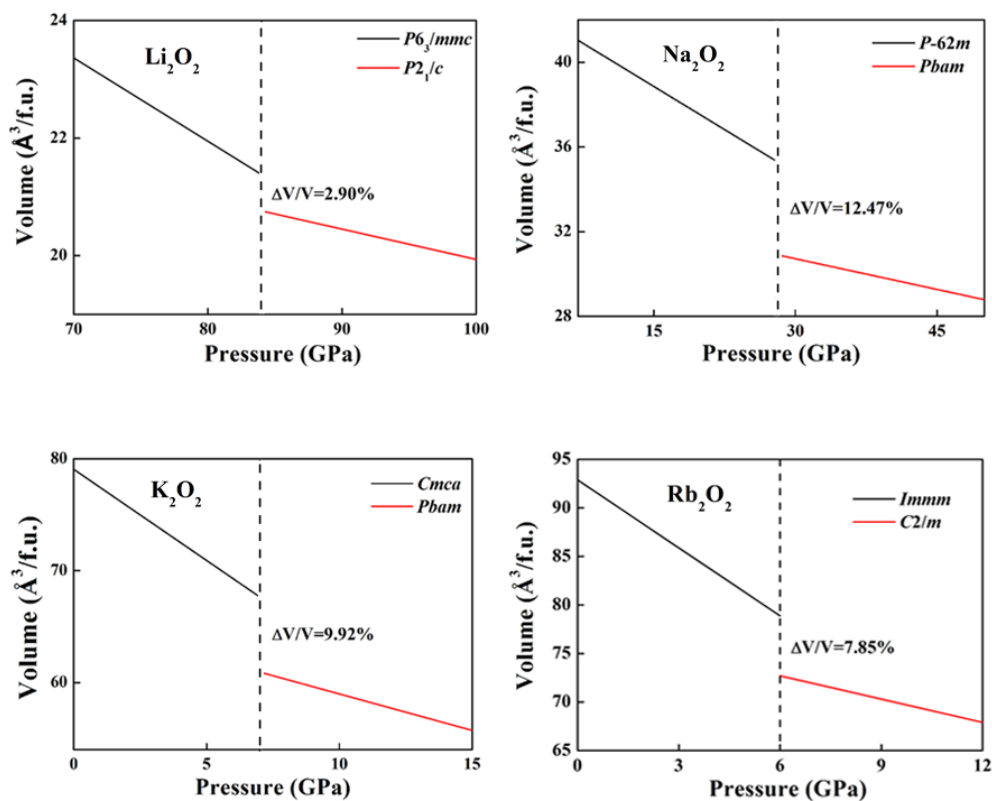

**Fig. S6** Variation of the unit cell volume as a function of pressure for the ambient pressure structures and first-ordered phase transition structures. Vertical dotted line indicates the transition pressure.

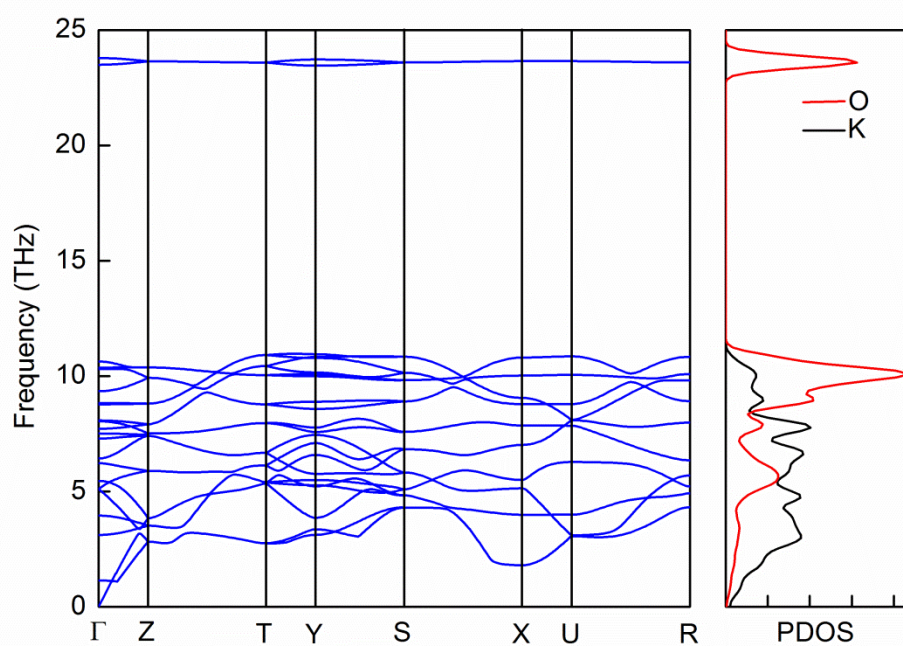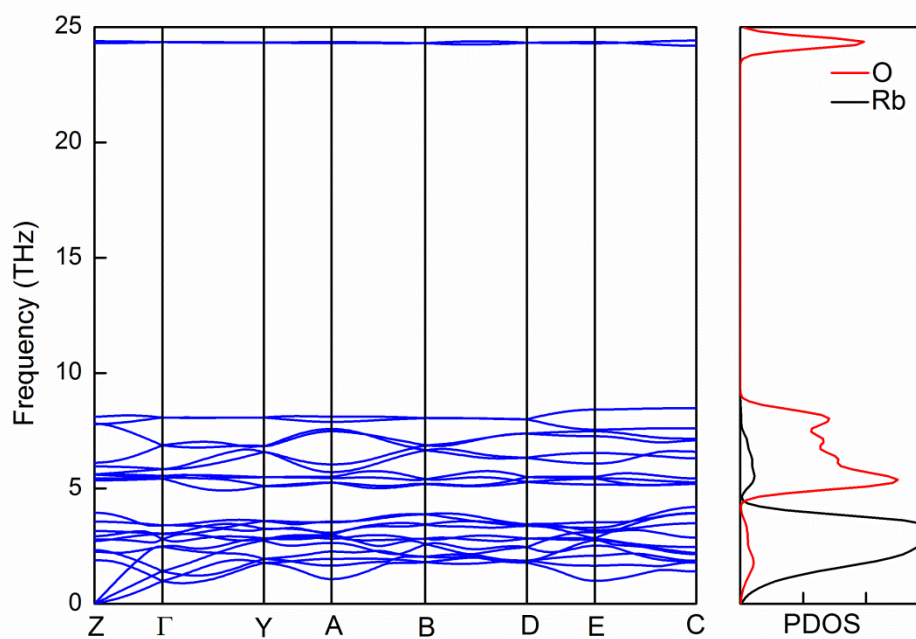

**Fig. S7** Phonon dispersion curve (blue) and partial phonon density of states (PDOS) for  $K_2O_2$  in the  $pbam$  structure and  $Rb_2O_2$  in the  $C2/m$  structure, respectively.



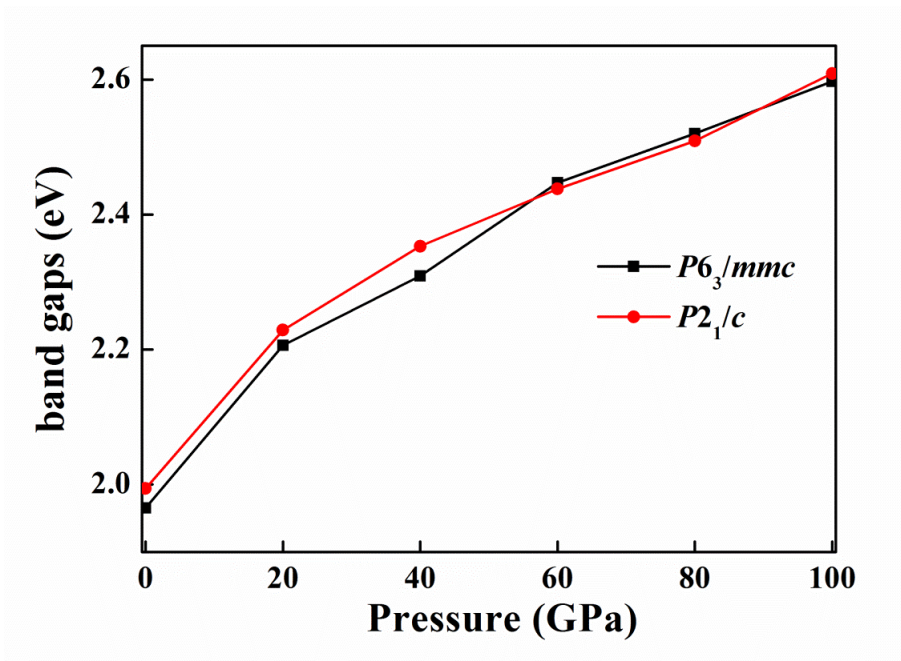

**Fig. S8** Pressure dependence of band gaps for the  $P6_3/mmc$  and  $P2_1/c$  structures in  $\text{Li}_2\text{O}_2$ .

**Table S1.** The Bader or Mulliken charge for the  $P6_3mmc$  and  $P2_1/c$  structures of  $\text{Li}_2\text{O}_2$ .

| $\text{Li}_2\text{O}_2$ | $P6_3mmc$ |          | $P2_1/c$ |          |
|-------------------------|-----------|----------|----------|----------|
|                         | Bader     | Mulliken | Bader    | Mulliken |
| Li                      | 0.90      | 0.99     | 0.85     | 0.90     |
| Li                      | 0.90      | 0.99     | 0.85     | 0.90     |
| Li                      | 0.86      | 0.77     | 0.85     | 0.90     |
| Li                      | 0.86      | 0.77     | 0.85     | 0.90     |
| O                       | -0.90     | -0.88    | -0.85    | -0.90    |
| O                       | -0.90     | -0.88    | -0.85    | -0.90    |
| O                       | -0.86     | -0.88    | -0.85    | -0.90    |
| O                       | -0.86     | -0.88    | -0.85    | -0.90    |

**Table S2.** Detailed structural information of the predicted first-order phase transition structures at selected pressures.

| <b>Phases</b>                                       | <b>Pressure<br/>(GPa)</b> | <b>Lattice parameters<br/>(Å, °)</b> | <b>Atomic coordinates<br/>(fractional)</b> |        |       |        |
|-----------------------------------------------------|---------------------------|--------------------------------------|--------------------------------------------|--------|-------|--------|
| <b>Li<sub>2</sub>O<sub>2</sub>-P2<sub>1</sub>/c</b> | 84                        | $a = 6.393$                          | Li(2a)                                     | 0.270  | 0.392 | -0.095 |
|                                                     |                           | $b = 2.561$                          | O(2a)                                      | -0.192 | 0.899 | -0.594 |
|                                                     |                           | $c = 6.801$                          |                                            |        |       |        |
|                                                     |                           | $\alpha = \gamma = 90.000$           |                                            |        |       |        |
|                                                     |                           | $\beta = 158.107$                    |                                            |        |       |        |
| <b>Na<sub>2</sub>O<sub>2</sub>-Pbam</b>             | 28                        | $a = 3.424$                          | Na(4g)                                     | -0.852 | 0.358 | 0      |
|                                                     |                           | $b = 6.579$                          | O(4h)                                      | -0.370 | 0.407 | -0.5   |
|                                                     |                           | $c = 2.745$                          |                                            |        |       |        |
|                                                     |                           | $\alpha = \beta = \gamma = 90.000$   |                                            |        |       |        |
| <b>K<sub>2</sub>O<sub>2</sub>-Pbam</b>              | 7                         | $a = 4.668$                          | K(4g)                                      | -0.804 | 0.358 | 0      |
|                                                     |                           | $b = 7.738$                          | O(4h)                                      | -0.399 | 0.422 | -0.5   |
|                                                     |                           | $c = 3.375$                          |                                            |        |       |        |
|                                                     |                           | $\alpha = \beta = \gamma = 90.000$   |                                            |        |       |        |
| <b>Rb<sub>2</sub>O<sub>2</sub>-C2/m</b>             | 6                         | $a = 9.254$                          | Rb(4i)                                     | 0.860  | 0     | 0.221  |
|                                                     |                           | $b = 3.70$                           | O(4i)                                      | 0.938  | 0.5   | 0.631  |
|                                                     |                           | $c = 4.270$                          |                                            |        |       |        |
|                                                     |                           | $\alpha = \gamma = 90.000$           |                                            |        |       |        |
|                                                     |                           | $\beta = 83.927$                     |                                            |        |       |        |

**Reference:**

- (1) Wang, Y.; Lv, J.; Zhu, L.; Ma, Y. Crystal Structure Prediction via Particle-Swarm Optimization. *Phys. Rev. B* **2010**, *82*, 094116.
- (2) Wang, Y.; Lv, J.; Zhu, L.; Ma, Y. CALYPSO: A Method for Crystal Structure Prediction. *Comput. Phys. Commun.* **2012**, *183*, 2063.
- (3) Kresse, G.; Furthmuller, J. Efficient Iterative Schemes for ab initio Total-Energy Calculations Using a Plane-Wave Basis Set. *Phys. Rev. B* **1996**, *54*, 11169.
- (4) Perdew, J. P.; Chevary, J. A.; Vosko, S. H.; Jackson, K. A.; Pederson, M. R.; Singh, D. J.; Fiolhais, C. Atoms, Molecules, Solids, and Surfaces: Applications of the Generalized Gradient Approximation for Exchange and Correlation. *Phys. Rev. B* **1992**, *46*, 6671.
- (5) Togo, A.; Oba, F.; Tanaka, I., *Phys. Rev. B* **2008**, *78*, 134106.
